# Supplementary material for: Management of Osteoarthritis and Joint Support Using Feed Supplements: A Scoping Review of Undenatured Type II Collagen and Boswellia serrata
Source: MDPI journal article supplement (doi:10.3390/ani13050870), 2023-02-27
Supplement: s1 [file s1]

**Table S1.** Description of the feed supplements used in each of the studies

| Ref. |      | Complementary feed                                                                                                                                                                                                                                                                                                                                                                                                                                         |
|------|------|------------------------------------------------------------------------------------------------------------------------------------------------------------------------------------------------------------------------------------------------------------------------------------------------------------------------------------------------------------------------------------------------------------------------------------------------------------|
| 1    | [55] | UC-II® 1 mg/day (Group II) or 10 mg/day (Group III) of active ingredient (InterHealth Nutraceuticals Inc.)                                                                                                                                                                                                                                                                                                                                                 |
| 2    | [30] | UC-II® 10 mg/day (Group II) of active ingredient, Glucosamine 2000 mg/day, Chondroitin 1600 mg/day (Group III), UC-II® 10 mg/day of active ingredient, Glucosamine 2000 mg/day, Chondroitin 1600 mg/day (Group IV) (InterHealth Nutraceuticals Inc.)                                                                                                                                                                                                       |
| 3    | [56] | UC-II® 10 mg/day of active ingredient (Group II), (-)-hydroxycitric acid 1800 mg/day (Group III), (-)-hydroxycitric acid 1800 mg/day, chromemate 100 mcg/day, (Group IV), UC-II® 10 mg/day of active ingredient, (-)-hydroxycitric acid 1800 mg/day, chromemate 100 mcg/day (Group V) (InterHealth Nutraceuticals Inc.)                                                                                                                                    |
| 4    | [57] | UC-II® 10 mg/day of active ingredient (InterHealth Nutraceuticals Inc) (Group II)                                                                                                                                                                                                                                                                                                                                                                          |
| 5    | [58] | UC-II® 10 mg/day of active ingredient (Group II), Glucosamine 2000 mg/day, Chondroitin 1600 mg/day (Group III), UC-II® 10 mg/day of active ingredient, Glucosamine 2000 mg/day, Chondroitin 1600 mg/day (Group IV) (InterHealth Nutraceuticals Inc.)                                                                                                                                                                                                       |
| 6    | [59] | Undenatured Type II Collagen 10 mg/day of active ingredient (creme nonfibrou powder; NEXT-II) (Ryusendo Co. Ltd.) (Group II)                                                                                                                                                                                                                                                                                                                               |
| 7    | [60] | Robenacoxib 1 mg/kg/day (Onsior®) (Group I), UC-II® 10 mg/day of active ingredient, Omega 3-fatty acid, Vitamin E (Flexadin® Advanced, Vetoquinol S.r.l.) (Group II)                                                                                                                                                                                                                                                                                       |
| 8    | [61] | Undenatured Type II Collagen 10 mg/day (no specify commercial product).                                                                                                                                                                                                                                                                                                                                                                                    |
| 9    | [62] | UC-II® 10 mg/day of active ingredient (Lonza Consumer Health Inc.) (Group II)                                                                                                                                                                                                                                                                                                                                                                              |
| 10   | [63] | UC-II® 10 mg/day of active ingredient (Lonza Consumer Health Inc.) (Group II)                                                                                                                                                                                                                                                                                                                                                                              |
| 11   | [64] | UC-II® 10 mg/day of active ingredient, Omega 3-fatty acid, Vitamin E (Flexadin® Advanced, Vetoquinol S.r.l.)                                                                                                                                                                                                                                                                                                                                               |
| 12   | [65] | Cimicoxib 2 mg/kg/day (Cimalgex®, Vetoquinol) (Group II), UC-II® 10 mg/day of active ingredient, Omega 3-fatty acid, Vitamin E (Flexadin® Advanced, Vetoquinol S.r.l.) (Group III), Cimicoxib 2 mg/kg/day + UC-II® 10 mg/day of active ingredient, Omega 3-fatty acid, Vitamin E (Group IV)                                                                                                                                                                |
| 13   | [66] | UC-II® 10 mg/day of active ingredient (Lonza Consumer Health Inc.) (Group II)                                                                                                                                                                                                                                                                                                                                                                              |
| 14   | [67] | UC-II® 10 mg/day of active ingredient (Lonza Consumer Health Inc.) (Group II)                                                                                                                                                                                                                                                                                                                                                                              |
| 15   | [34] | <i>Boswellia serrata</i> 400 mg/10 kg/day (extract BSB108, BOGAR AG)                                                                                                                                                                                                                                                                                                                                                                                       |
| 16   | [68] | <i>Boswellia serrata</i> , <i>Harpagophytum procumbens</i> , <i>Ribes nigrum</i> , <i>Salix alba</i> , <i>Tanacetum parthenium</i> , Omega 3-fatty acid (Group II-A)<br><i>Boswellia serrata</i> , <i>Harpagophytum procumbens</i> , <i>Ribes nigrum</i> , <i>Ananas comosus</i> , <i>Curcuma longa</i> , Omega 3-fatty acid, Glucosamine, Methylsulfonylmethane, Chondroitin, L-glutamate, Hyaluronic acid (Natural Health product formulation) (Group-B) |

|    |      |                                                                                                                                                                                                                                                                                     |
|----|------|-------------------------------------------------------------------------------------------------------------------------------------------------------------------------------------------------------------------------------------------------------------------------------------|
| 17 | [52] | <i>Boswellia serrata</i> , Glucosamine, Chondroitin, Chitosamine, Omega- 3/6 fatty acid, green-lipped mussel, <i>Harpagophytum procumbens</i> (Sanypet Forza 10, USA Corporation) (Group II)                                                                                        |
| 18 | [26] | <i>Boswellia serrata</i> , Glucosamine, Chondroitine, <i>Ribes nigrum</i> , Krill flour 1%, <i>Lentinus edode</i> , <i>Equisetum arvense</i> , <i>Curcuma longa</i> , <i>Harpagophytum procumbens</i> (Daynamopet srl) (Group II)                                                   |
| 19 | [69] | <i>Boswellia serrata</i> , Eggshell, Astaxanthin, Hyaluronic acid, Vitamin D (Movoflex, Virbac) (Group II)                                                                                                                                                                          |
| 21 | [54] | <i>Boswellia serrata</i> 150 mg/15 kg/day, <i>Cannabis sativa</i> , <i>Cucumis melo</i> L., <i>Cannabidioil</i> (Candoli Pharma Srl.)                                                                                                                                               |
| 21 | [70] | Glucosamine, Chondroitin, Omega 3-fatty acid, Vitamin C and E, <i>Saccharomyces Cerevisiae</i> (Group I)<br><i>Boswellia serrata</i> , Glucosamine, Chondroitin, Omega 3-fatty acid, Vitamin C and E, <i>Saccharomyces Cerevisiae</i> , <i>Curcuma</i> (Aurora Biofarma) (Group II) |
| 22 | [71] | <i>Boswellia serrata</i> , Canapa oil, <i>Zingiber officinale</i> , Vitamin C, Alfa-tocoferol (Evexia Plus, Candoli Pharma Srl.) (Group II)                                                                                                                                         |
| 23 | [72] | <i>Boswellia serrata</i> Roxb, <i>Cannabis sativa</i> oil, <i>Zingiber officinale</i> extract (Evexia Plus, Candoli Pharma Srl.) (Group II)                                                                                                                                         |
| 24 | [73] | <i>Boswellia</i> gum, Bromelain, Devil's claw tuber, Sarsaparilla root, Dandelion root, Yucca root, Turmeric root extract (Pet Wellbeing Agile Joins) (Group II)                                                                                                                    |
| 25 | [36] | <i>Boswellia serrata</i> 31,5 mg, Undenatured Type II Collagen 4 mg, <i>Curcuma longa</i> , Green tea extract, Glucosamine, Chondroitin sulfate, Hyaluronic acid (Confis Ultra, Candioli Pharma Srl)                                                                                |
| 26 | [37] | <i>Boswellia serrata</i> , Undenatured Type II Collagen, Chlorophyll, Green tea extract, Glucosamine, Chondroitin, Hyaluronic acid (Confis Ultra, Candioli Pharma Srl) (Group II)                                                                                                   |
